# Supplementary material for: Carrot Juice Fermentations as Man-Made Microbial Ecosystems Dominated by Lactic Acid Bacteria
Source: PubMed Central journal article supplement (PMC5981062; doi:10.1128/aem.00134-18), 2018-05-31
Supplement: AEM.00134-18_zam012188562s1.pdf [file AEM.00134-18_zam012188562s1.pdf]

## SUPPLEMENTAL MATERIAL

**Table S1.** *Leuconostoc* and *Lactobacillus* amplicon sequence variants (ASVs) from the carrot juice fermentations (laboratory, LF1 and LF2; household, HF), their occurrence, maximum relative abundance, identification using EzBioCloud 16S database (1), and the number of differential versus total nucleotides.

| ASV                         | Occurrence (# fermentations) | Maximum relative abundance (%) | EzBiocloud identification                                                                                                                          | Differential / Total nucleotides |
|-----------------------------|------------------------------|--------------------------------|----------------------------------------------------------------------------------------------------------------------------------------------------|----------------------------------|
| <b><i>Leuconostoc</i></b>   |                              |                                |                                                                                                                                                    |                                  |
| <i>Leuconostoc</i> 1        | 20                           | 51.53                          | <i>Leuconostoc pseudomesenteroides</i>                                                                                                             | 0/233                            |
| <i>Leuconostoc</i> 2        | 39                           | 37.00                          | <i>Leuconostoc mesenteroides</i>                                                                                                                   | 0/233                            |
| <i>Leuconostoc</i> 3        | 35                           | 39.62                          | <i>Leuconostoc gelidum</i> ,<br><i>Leuconostoc myukkimchii</i> ,<br><i>Leuconostoc inhae</i>                                                       | 0/233                            |
| <i>Leuconostoc</i> 4        | 9                            | 14.86                          | <i>Leuconostoc rapi</i> ,<br><i>Leuconostoc kimchii</i>                                                                                            | 0/233                            |
| <i>Leuconostoc</i> 5        | 14                           | 10.05                          | <i>Leuconostoc gelidum</i> subsp. <i>gasicomitatum</i>                                                                                             | 0/233                            |
| <i>Leuconostoc</i> 6        | 7                            | 6.05                           | <i>Leuconostoc lactis</i> ,<br><i>Leuconostoc palmae</i> ,<br><i>Leuconostoc holzapfelii</i> ,<br><i>Leuconostoc citreum</i>                       | 0/233                            |
| <i>Leuconostoc</i> 7        | 6                            | 4.78                           | <i>Leuconostoc gelidum</i> ,<br><i>Leuconostoc myukkimchii</i> ,<br><i>Leuconostoc inhae</i>                                                       | 1/233                            |
| <i>Leuconostoc</i> 8        | 1                            | 1.24                           | <i>Leuconostoc camosum</i>                                                                                                                         | 0/233                            |
| <b><i>Lactobacillus</i></b> |                              |                                |                                                                                                                                                    |                                  |
| <i>Lactobacillus</i> 1      | 23                           | 70.55                          | <i>Lactobacillus xiangfangensis</i> ,<br><i>Lactobacillus modestisalitolerans</i>                                                                  | 1/233                            |
| <i>Lactobacillus</i> 2      | 23                           | 63.01                          | <i>Lactobacillus herbarum</i>                                                                                                                      | 1/233                            |
| <i>Lactobacillus</i> 3      | 9                            | 50.50                          | <i>Lactobacillus mudanjiangensis</i>                                                                                                               | 1/233                            |
| <i>Lactobacillus</i> 4      | 20                           | 35.8                           | <i>Lactobacillus pentosus</i> ,<br><i>Lactobacillus fabifermentans</i> ,<br><i>Lactobacillus paraplantarum</i> ,<br><i>Lactobacillus plantarum</i> | 0/233                            |
| <i>Lactobacillus</i> 5      | 7                            | 32.91                          | <i>Lactobacillus curvatus</i> ,<br><i>Lactobacillus sakei</i>                                                                                      | 0/233                            |
| <i>Lactobacillus</i> 6      | 6                            | 9.43                           | <i>Lactobacillus brevis</i>                                                                                                                        | 0/233                            |
| <i>Lactobacillus</i> 7      | 1                            | 23.62                          | <i>Lactobacillus pentosus</i> ,<br><i>Lactobacillus fabifermentans</i> ,<br><i>Lactobacillus paraplantarum</i> ,<br><i>Lactobacillus plantarum</i> | 1/233                            |
| <i>Lactobacillus</i> 8      | 1                            | 21.18                          | <i>Lactobacillus uvarum</i> ,<br><i>Lactobacillus aquaticus</i>                                                                                    | 0/233                            |
| <i>Lactobacillus</i> 9      | 1                            | 13.79                          | <i>Lactobacillus coryniformis</i>                                                                                                                  | 0/233                            |
| <i>Lactobacillus</i> 10     | 2                            | 13.14                          | <i>Lactobacillus nejiangensis</i>                                                                                                                  | 0/233                            |
| <i>Lactobacillus</i> 11     | 1                            | 9.94                           | <i>Lactobacillus coryniformis</i>                                                                                                                  | 0/233                            |
| <i>Lactobacillus</i> 12     | 1                            | 9.66                           | <i>Lactobacillus pentosus</i> ,<br><i>Lactobacillus fabifermentans</i> ,<br><i>Lactobacillus paraplantarum</i> ,<br><i>Lactobacillus plantarum</i> | 1/233                            |
| <i>Lactobacillus</i> 13     | 1                            | 8.69                           | <i>Lactobacillus vaccinoferus</i> ,<br><i>Lactobacillus wasatchensis</i> ,<br><i>Lactobacillus</i> sp. SW201                                       | 0/233                            |
| <i>Lactobacillus</i> 14     | 1                            | 7.91                           | <i>Lactobacillus pentosus</i> ,<br><i>Lactobacillus fabifermentans</i> ,<br><i>Lactobacillus paraplantarum</i> ,<br><i>Lactobacillus plantarum</i> | 1/233                            |
| <i>Lactobacillus</i> 15     | 1                            | 2.61                           | <i>Lactobacillus xiangfangensis</i> ,<br><i>Lactobacillus modestisalitolerans</i>                                                                  | 1/233                            |
| <i>Lactobacillus</i> 16     | 3                            | 6.14                           | <i>Lactobacillus hordei</i> ,<br><i>Lactobacillus mali</i>                                                                                         | 0/233                            |
| <i>Lactobacillus</i> 17     | 1                            | 1.30                           | <i>Lactobacillus paucivorans</i>                                                                                                                   | 1/233                            |
| <i>Lactobacillus</i> 18     | 1                            | 0.89                           | <i>Lactobacillus casei</i> , <i>Lactobacillus paracasei</i>                                                                                        | 0/233                            |
| <i>Lactobacillus</i> 19     | 1                            | 1.70                           | <i>Lactobacillus herbarum</i>                                                                                                                      | 2/233                            |
| <i>Lactobacillus</i> 20     | 1                            | 0.33                           | <i>Lactobacillus paucivorans</i>                                                                                                                   | 2/233                            |

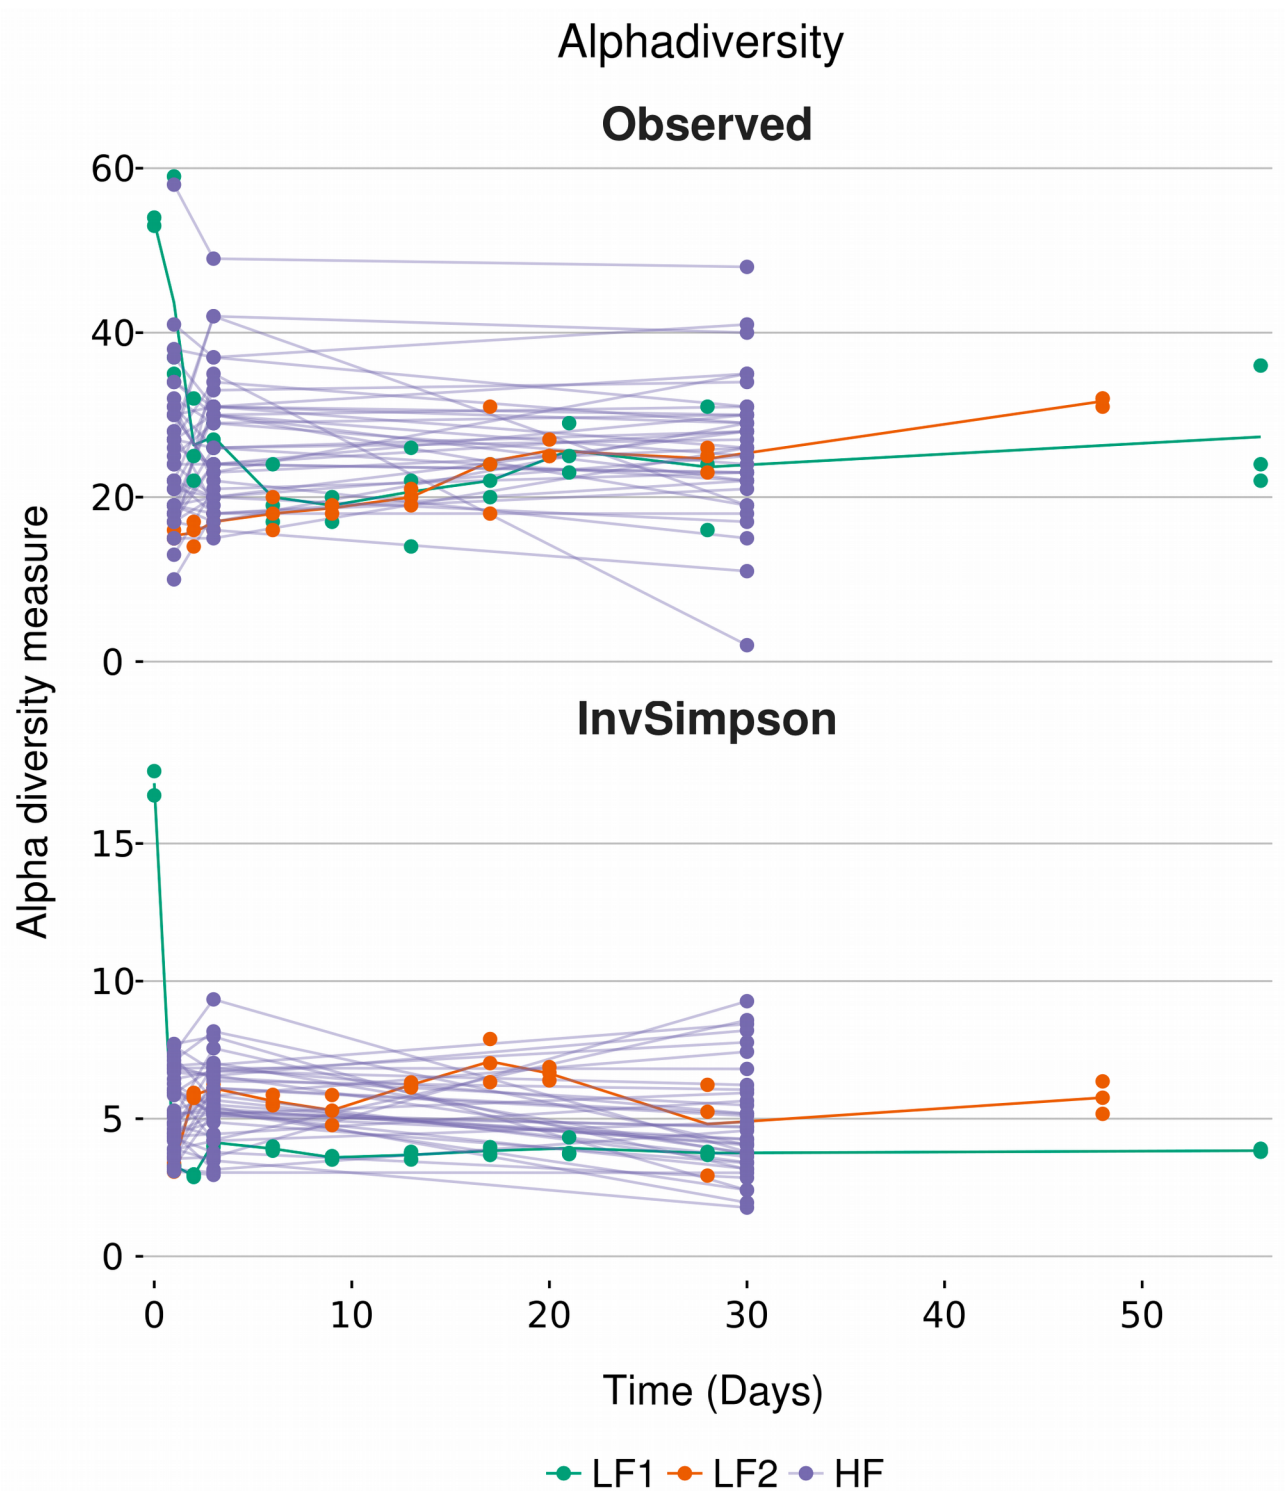

**Figure S1.** Alpha diversity metrics of all laboratory (LF1 and LF2) and household (HF) carrot juice fermentations examined after 16S rRNA gene sequencing of the V4 region and data processing using DADA2 (2).

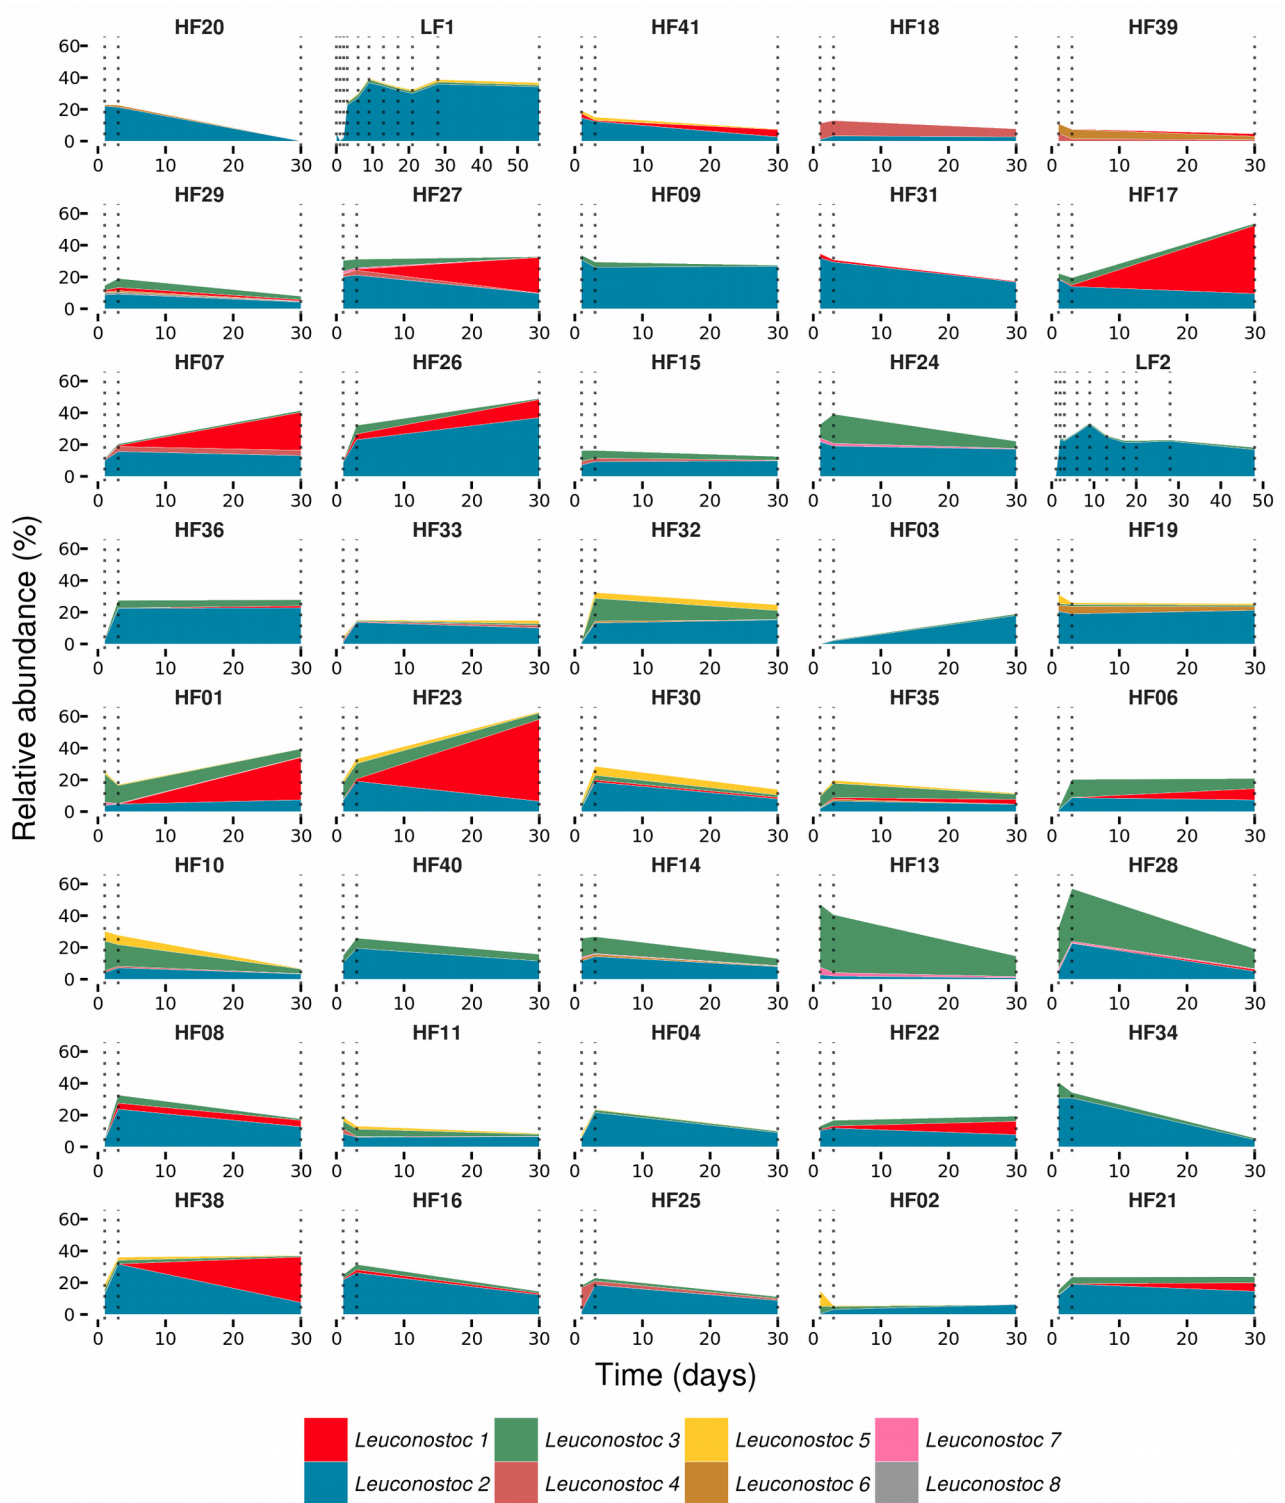

**Figure S2.** 16S rRNA gene sequencing taxonomic profiles showing all *Leuconostoc* ASVs of the laboratory carrot juice fermentation 1 (LF1), laboratory carrot juice fermentation 2 (LF2) and the household carrot juice fermentations (HF01–HF41). Sampling points are indicated with a dashed line. The order of appearance of the fermentations is based on hierarchical clustering of the Bray-Curtis dissimilarity matrix of all day-30 samples.

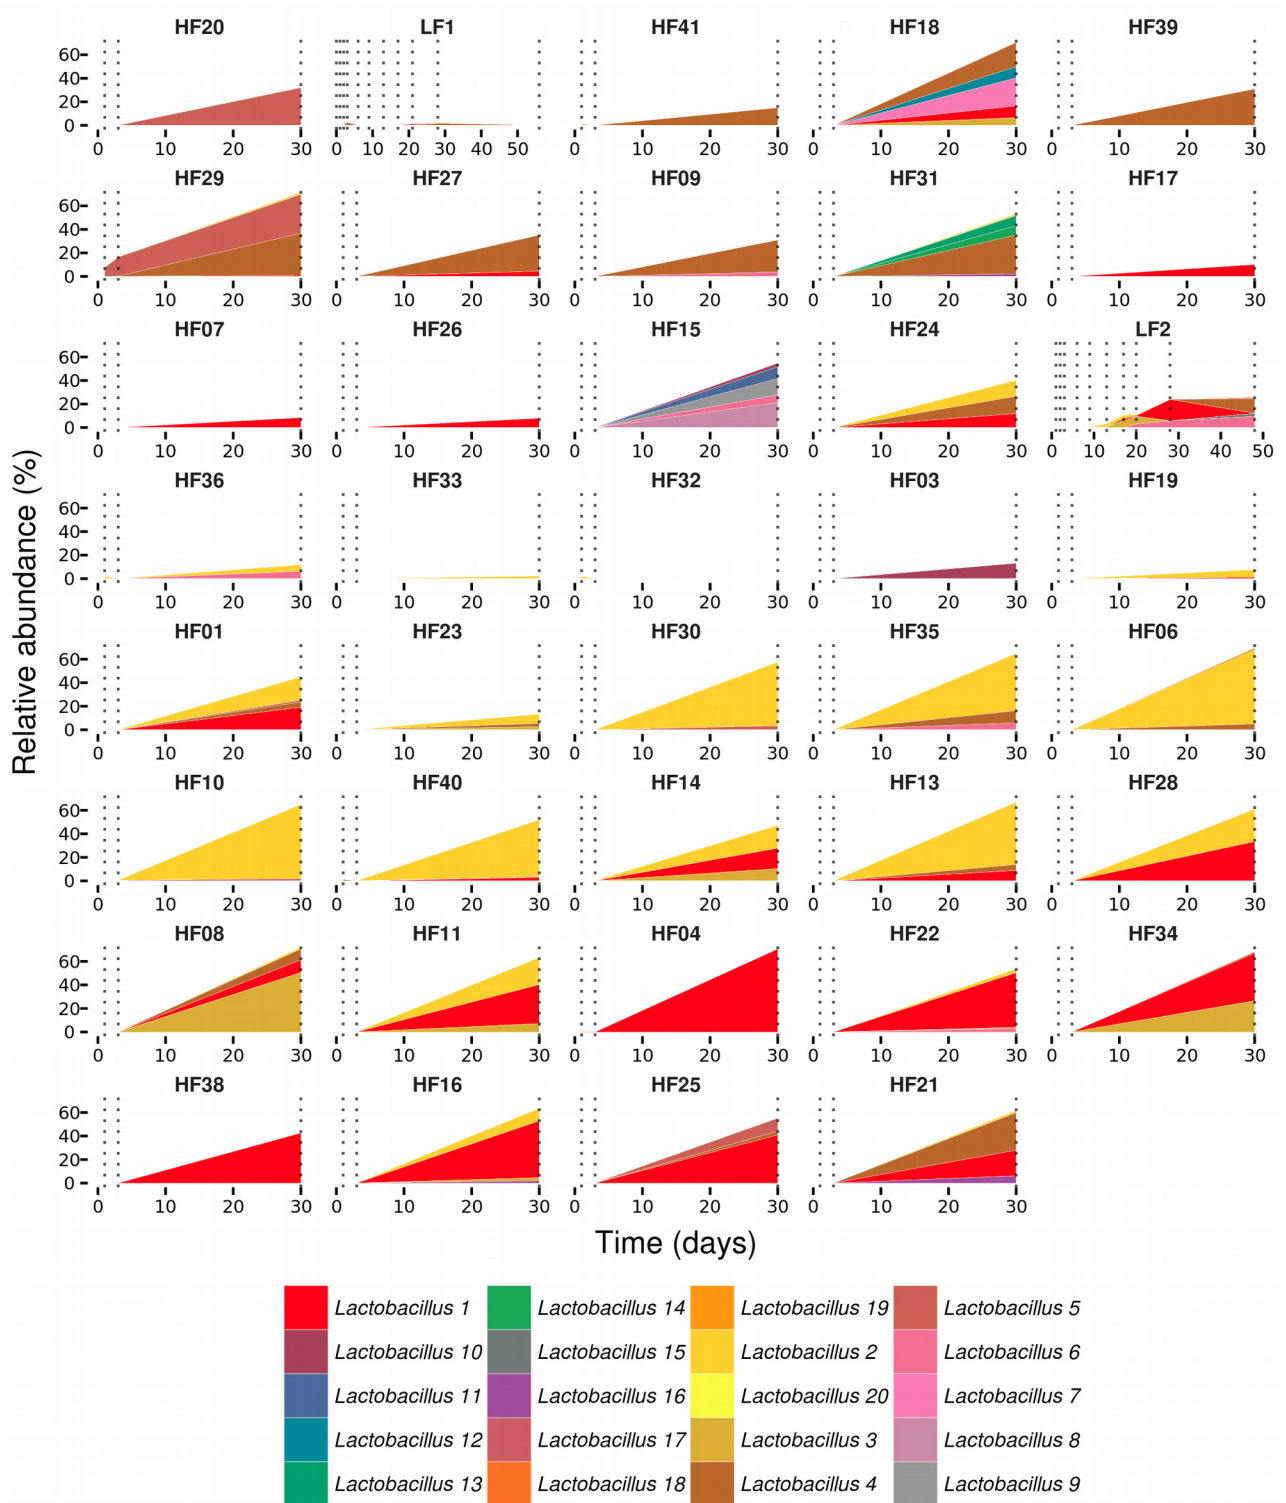

**Figure S3.** 16S rRNA gene sequencing taxonomic profiles showing all *Lactobacillus* ASVs of the laboratory carrot juice fermentation 1 (LF1), laboratory carrot juice fermentation 2 (LF2) and the household carrot juice fermentations (HF01–HF41). Sampling points are indicated with a dashed line. The order of appearance of the fermentations is based on hierarchical clustering of the Bray-Curtis dissimilarity matrix of all day-30 samples.

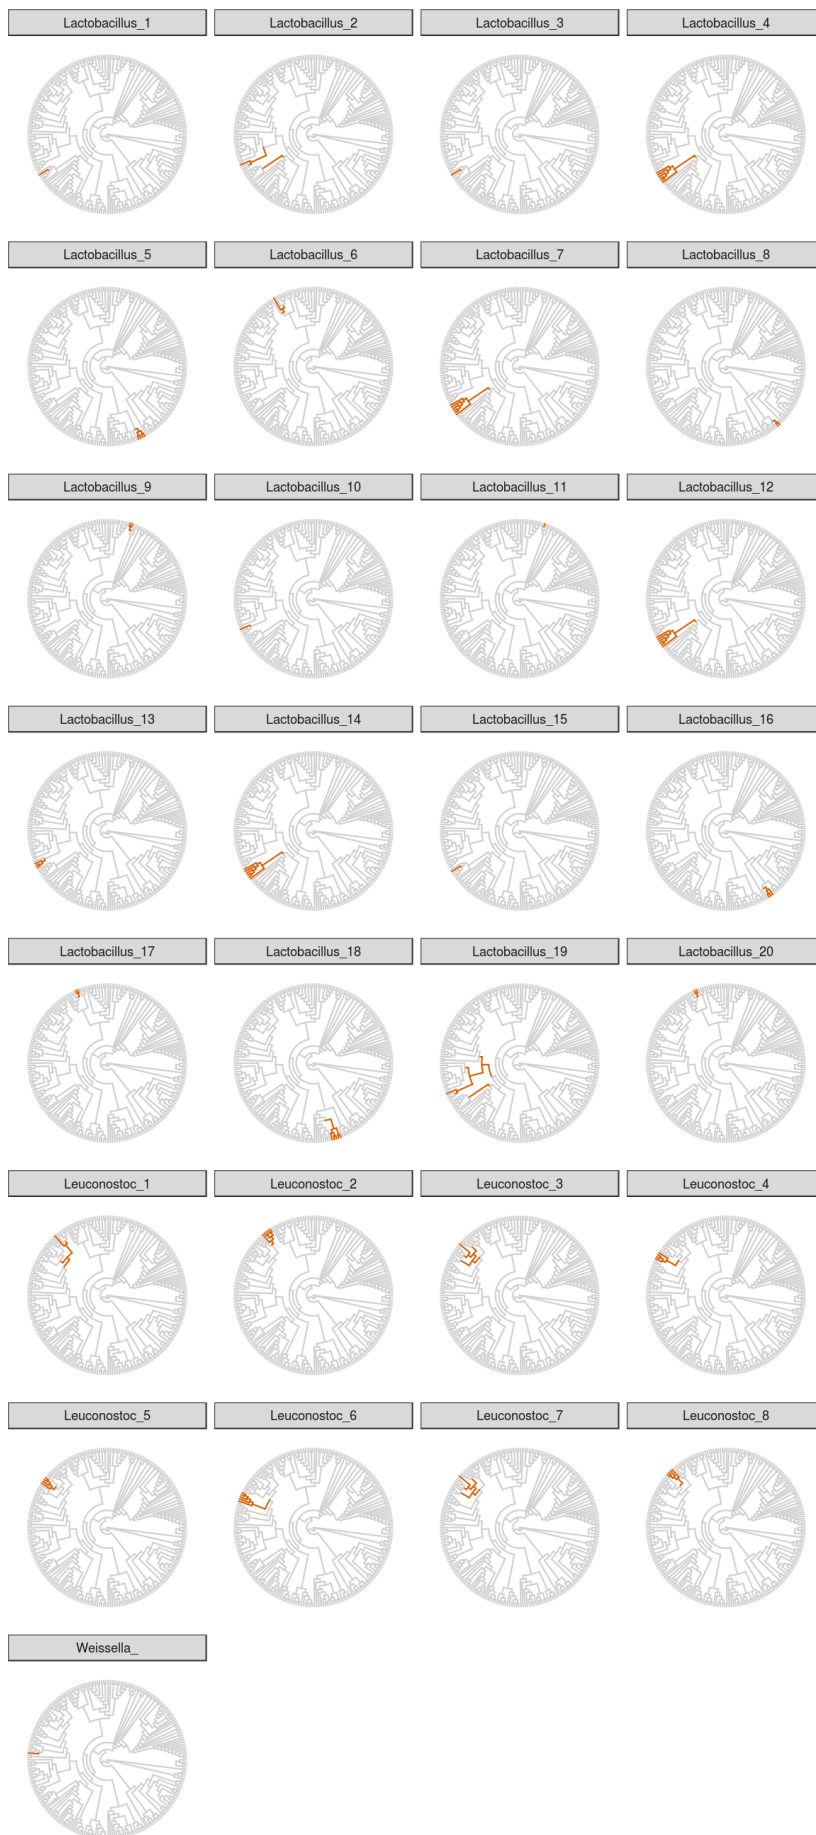

**Figure S4.** Phylogenetic placement of ASVs on a 16S rRNA gene phylogenetic tree of the *Lactobacillus* genus complex visualized for all LAB ASVs. The phylogenetic tree is visualized as a cladogram. Branches on which an ASV could be mapped are colored in orange.

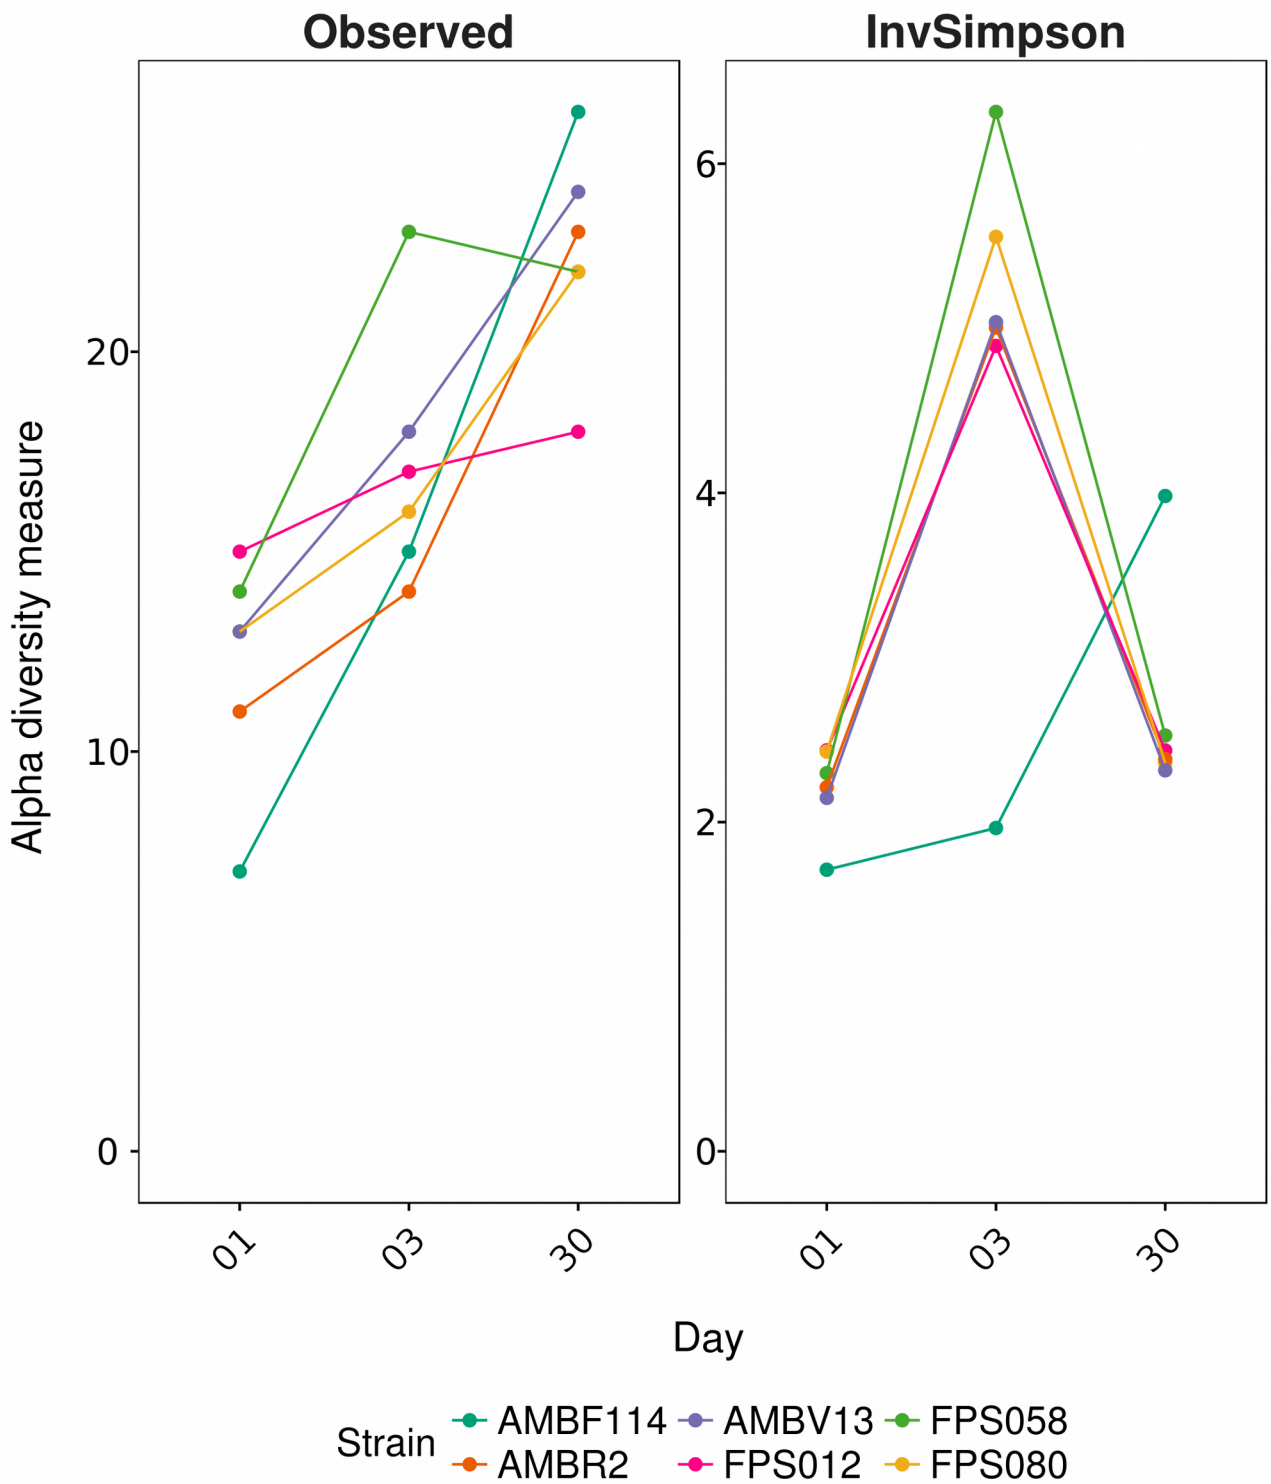

**Figure S5.** Alpha diversity metrics of all starter-culture fermentations after 16S rRNA gene sequencing of the V4 region and data processing using DADA2 (2).

## References

1. Yoon SH, Ha SM, Kwon S, Lim J, Kim Y, Seo H, Chun J. 2017. Introducing EzBioCloud: A taxonomically united database of 16S rRNA gene sequences and whole-genome assemblies. *Int J Syst Evol Microbiol* 67:1613–1617.
2. Callahan BJ, McMurdie PJ, Rosen MJ, Han AW, Johnson AJA, Holmes SP. 2016. DADA2: High-resolution sample inference from Illumina amplicon data. *Nat Methods* 13:581–583.
